# Supplementary material for: Construction and morphology of non-covalently double-crosslinked supramolecular polymer networks
Source: Royal Society of Chemistry journal article supplement (doi:10.1039/c9py00681h), 2019-01-01
Supplement: c9py00681h1.pdf [file c9py00681h1.pdf]

*Electronic Supplementary Information for:*

## **Construction and Morphology of Non-Covalently Double-Crosslinked Supramolecular Polymer Networks**

---

Senbin Chen,\* Ke Wang, Zhen Geng, Yu Chen, Xihuang Zheng, Huiying Wang, Jintao Zhu\*

State Key Laboratory of Materials Processing and Mold Technology, and Key Laboratory of Materials Chemistry for Energy Conversion and Storage of Ministry of Education (HUST), School of Chemistry and Chemical Engineering, Huazhong University of Science and Technology (HUST), Wuhan 430074, China

\*Correspondence to: jtzhu@mail.hust.edu.cn (J. Zhu)

senbin@hust.edu.cn (S. Chen)

## Table of Contents:

|                                                                                       |           |
|---------------------------------------------------------------------------------------|-----------|
| <b>Experimental Section .....</b>                                                     | <b>3</b>  |
| Materials.....                                                                        | 3         |
| Characterization methods .....                                                        | 3         |
| Polymerization of <i>n</i> BuA to afford Ba- <i>Pn</i> BuA-Br .....                   | 5         |
| Synthesis of Ba- <i>Pn</i> BuA-N <sub>3</sub> .....                                   | 6         |
| Synthesis of alkyne terminated 2,4,6-triaminopyrimidine, alkyne-TAP (Figure S1) ..... | 6         |
| Synthesis of Ba- <i>Pn</i> BuA-TAP .....                                              | 9         |
| MALDI-TOF MS results .....                                                            | 10        |
| UV/Vis spectra.....                                                                   | 11        |
| Rheological results .....                                                             | 11        |
| TEM results .....                                                                     | 12        |
| AFM results .....                                                                     | 12        |
| DLS results.....                                                                      | 13        |
| <b>References.....</b>                                                                | <b>13</b> |

## Experimental Section

### Materials

All chemicals were purchased from Sigma-Aldrich, TCI or Alfa Aesar. *n*-Butyl acrylate (*n*BuA) was purified by passing through a column of basic aluminium oxide to remove inhibitors. 2,2'-Azobis(isobutyronitrile) (AIBN) was recrystallized twice from ethanol. Unless otherwise indicated, the other chemicals were used without further purification. The ATRP initiator, Ba-Br, was synthesized according to our previous report.<sup>1</sup>

### Characterization methods

<sup>1</sup>H NMR spectra were recorded on Varian Gemini 2000 FT-NMR spectrometer (400 MHz) or Varian unity Inova 500 (500 MHz) NMR spectrometer, using CD<sub>2</sub>Cl<sub>2</sub> as solvent.

Polymers were analyzed by size exclusion chromatography (SEC) running in THF at 35°C (flow rate: 1 mL·min<sup>-1</sup>) and recorded on GPCmax VE 2001 from Viscotek™, which equipped with a column set of a H<sub>HR</sub>-H Guard-17369 column, a CLM30111 column and a G2500H<sub>HR</sub>-17354 column. The average molar masse of polymers was derived from refractive index signal based on polystyrene calibration curve.

Matrix-assisted laser desorption/ionization time of flight mass spectrometry (MALDI-TOF MS) measurements were performed on Bruker Autoflex III system (Bruker Daltonics) operating in linear mode. Data evaluation was carried out on DataAnalysis software. Ions were formed by laser desorption (smart beam laser at 355, 532, 808, and 1064±5 nm; up to 50 Hz repetition rate), accelerated by a voltage of 20 kV and detected as positive ions. Samples were prepared by mixing 50 µL of trans-3-indolacrylic acid (IAA) at 20 g·L<sup>-1</sup> in THF with 10 µL of polymer solution at 20 g·L<sup>-1</sup> in THF. To enhance cationization of polymers, 1 µL of sodium

trifluoroacetate (NaTFA) at 20 g·L<sup>-1</sup> in THF was added to solutions. Finally, 1 µL of resulting mixture was spotted on a MALDI sample plate and air-dried.

UV–visible (UV–vis) spectroscopic studies were performed on a Beijing Rayleigh Analytical Instrument Co., China using CHCl<sub>3</sub> as solvent.

Rheology experiments were carried out on a rheometer from Anton Paar (Physica) MCR 101/SN 80753612. A parallel plate system with a plate diameter of ~8 mm diameter was used. The sample temperature was controlled by thermoelectric heating/cooling in a Peltier-chamber under an atmosphere of dry oxygen. The samples were annealed at 50 °C for approximately 10 h prior the rheology experiments. All measurements were performed in a dynamic mode with an angular frequency ranging from 0.01 to 100 rad/s. Frequency sweep measurements were performed within the linear viscoelastic (LVE) region between 100 °C to 0 °C in 10 °C steps whereas samples were equilibrated at least 15 min at each temperature. For the evaluation of data the Rheoplus software and OriginPro 8G were used.

Transmission electron microscopy (TEM) analyses were conducted with an EM 900 transmission electron microscope (Carl Zeiss Microscopy GmbH, Oberkochen, Germany). The samples were dissolved in toluene with a concentration of 2 g/L and spread onto a Cu grid coated with a Carbon-film. After 1 min, excess solution was blotted off with filter paper. Subsequently, ~5 µL of 1 % aqueous uranyl acetate solution were deposited onto the grid and drained off after 1 min. TEM images were taken from these negatively stained samples, using a SSCCD SM-1k-120 camera (TRS, Moorenweis, Germany).

Samples for atomic force microscopy (AFM) measurements were prepared by drop-casting polymer solutions in toluene (2 g/L) onto silicon wafers pre-cleaned via the piranha solution, followed by drying in air at room temperature. AFM images were obtained by a tapping mode with

a Digital Instruments Dimension 3100 Scanning Probe Microscope, performed at room temperature in air using standard silicon cantilevers with a nominal spring constant of 50 N/m and the resonance frequency of  $\sim 300$  kHz.

Dynamic light scattering (DLS) measurement was conducted in toluene solution at a concentration of 2 g/L on a Viscotek 802 using OmniSIZE software.

### **Polymerization of *n*BuA to afford Ba-*Pn*BuA-Br**

The AGET ATRP polymerization of *n*BuA to afford Ba-*Pn*BuA-Br is described in **Figure 2**. Typically, *n*BuA (0.36 mL, 2.5 mmol), CuBr<sub>2</sub> (1.1 mg, 0.005 mmol), and tris[2-(dimethylamino)ethyl]amine (Me<sub>6</sub>TREN, 1.3  $\mu$ L, 0.005 mmol) were dissolved in anisole (0.1 mL) in a Schlenk flask sealed with rubber septum and subsequently purged with argon for  $\sim 30$  min. Tin(II) 2-ethylhexanoate (Sn(EH)<sub>2</sub>, 10.1 mg, 0.025 mmol) and Ba-Br (23 mg, 0.05 mmol) were dissolved in anisole (0.2 mL) in a flask sealed with rubber septum and purged with argon for  $\sim 30$  min. After removing oxygen, the initiator and reducing agent were transferred to the reaction Schlenk flask via a cannula, and then immersed in an oil bath thermostated at 65 °C. 40 min later, the reaction was stopped by plunging the flask into liquid nitrogen. The polymer was subsequently precipitated twice into cold MeOH/H<sub>2</sub>O (1/1, v/v) in order to eliminate residual monomer. The polymer was dried under vacuum and characterized by <sup>1</sup>H NMR and SEC. The molar mass of pure poly(*n*BuA) was finally evaluated by <sup>1</sup>H NMR (CD<sub>2</sub>Cl<sub>2</sub>) from relative integration of the characteristic ester group protons of the *Pn*BuA backbone (-O-CH<sub>2</sub>-CH<sub>2</sub>-, 2nH,  $\delta$  = 4.05 ppm, with n being the degree of polymerization) and of the characteristic proton of Ba-Br (Br-CH-CH<sub>3</sub>, 1H,  $\delta$  = 4.20-4.28 ppm).

## Synthesis of Ba-PnBuA-N<sub>3</sub>

The synthesis of compound Ba-PnBuA-N<sub>3</sub> (**Figure 2**) was accomplished according to previous report with slight modification.<sup>2</sup> Ba-PnBuA-Br ( $M_{n\ NMR} = 4.4$  kDa,  $M_{n\ SEC} = 4.7$  kDa,  $\bar{D} = 1.19$ , 0.32 g, 0.07 mmol) and NaN<sub>3</sub> (0.014 g, 0.22 mmol) were dissolved in 1.5 mL DMF, which was stirred overnight at 50 °C. Then, dichloromethane was added into the solution, which was successively washed with saturated sodium bicarbonate, brine and H<sub>2</sub>O, respectively. The organic layer was dried over MgSO<sub>4</sub> and then the solvent was evaporated via rotavapor to afford Ba-PnBuA-N<sub>3</sub>.

## Synthesis of alkyne terminated 2,4,6-triaminopyrimidine, alkyne-TAP (**Figure S1**)

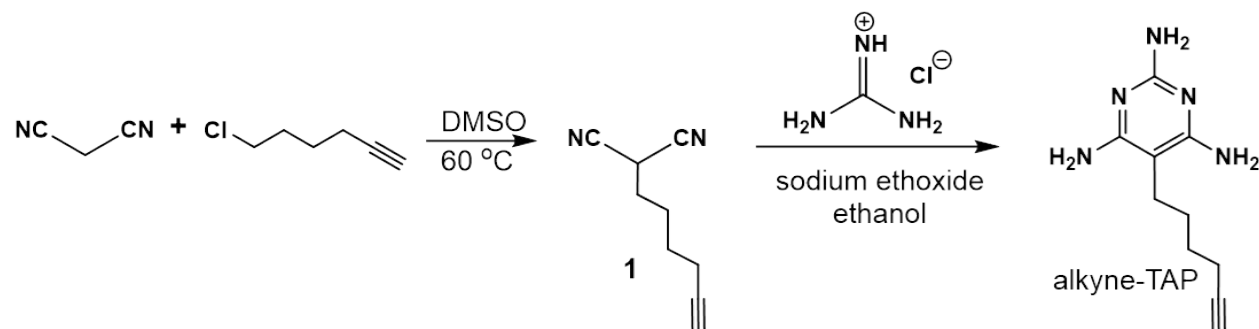

**Figure S1:** Synthetic route to alkyne-TAP.

Compound **1** was synthesized according to the previous report with slight modification.<sup>2</sup> Typically, to a stirred suspension of sodium hydride (60% in oil, 0.88 g, 22.0 mmol) in DMSO (20 mL), a solution of malononitrile (2.64 g, 40.0 mmol) in DMSO (5 mL) was added with cooling. After addition was complete, the mixture was stirred for 10 min; the temperature raised to 80 °C and 6-chloro-1-hexyne (2.33 g, 20.0 mmol) was added in one portion. The mixture was stirred for 3 h at 90 °C before being allowed to cool. The reaction mixture was poured into

water (50 mL) and extracted with dichloromethane (3 x 50 mL). The combined organic extract was washed with water (3 x 100 mL), saturated aqueous sodium chloride (2 x 100 mL), dried over magnesium sulfate and the solvent removed to give an orange oil. Chromatography on silica (eluent: ethyl acetate/hexane, 1/9, v/v) gave compound **1** (1.3 g, 45%, **Figure S2**) as a yellowish oil.

$^1\text{H}$  NMR ( $\text{CDCl}_3$ )  $\delta$  (ppm): 1.65 (quint, 2H), 1.77 (quint, 2H), 1.99 (t, 1H), 2.06 (quart, 1H), 2.26 (sext, 2H), 3.74 (t, 1H).

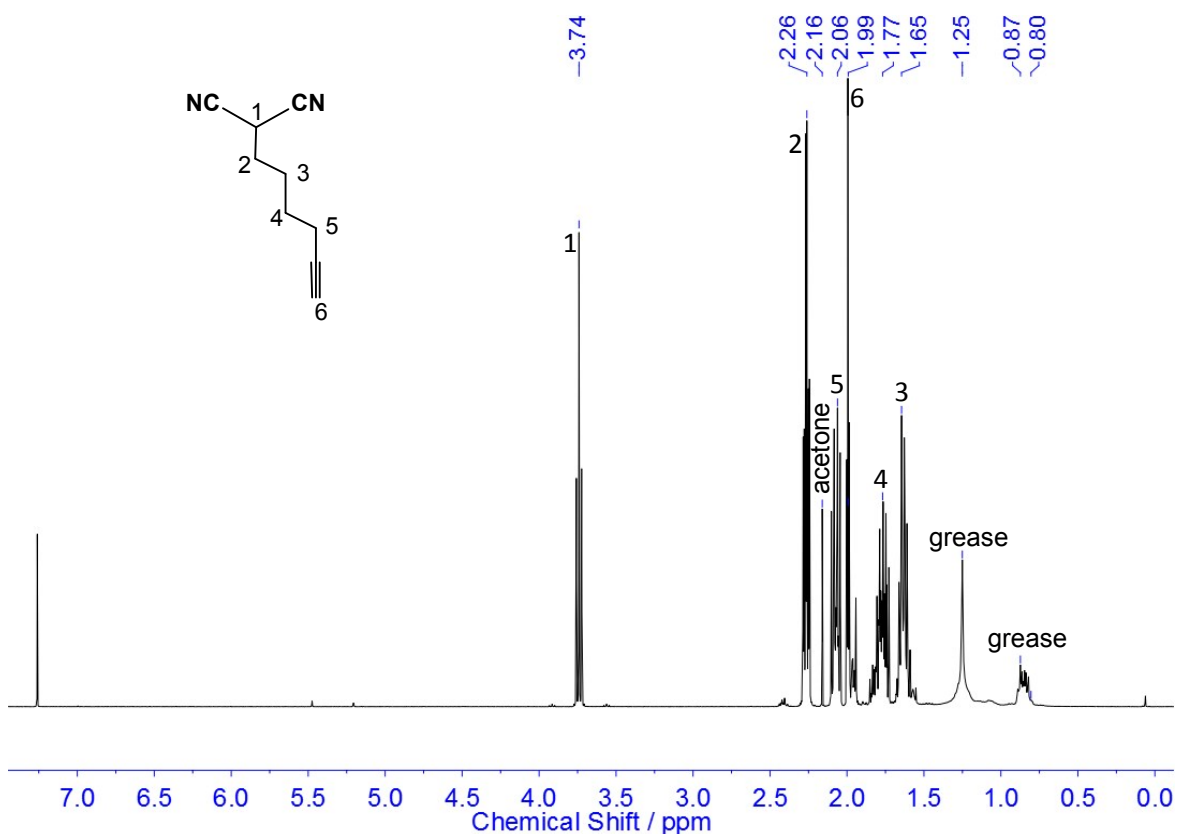

**Figure S2:**  $^1\text{H}$  NMR spectrum of compound **1** recorded in  $\text{CDCl}_3$  at 27 °C.

Alkyne-TAP was synthesized according to the published methods with slight modifications.<sup>2</sup> Typically, to a stirred solution of sodium ethoxide (782 mg, 11.5 mmol) in

ethanol (12 mL) was added guanidine hydrochloride (742 mg, 7.77 mmol). The mixture was stirred for 5 min and filtered to remove the precipitated sodium chloride. To the resulting solution compound **1** (1.02 g, 6.98 mmol) was added and the mixture was heated at 85 °C refluxing for 3 h. The reaction was allowed to cool; the solution was then filtered, and the residue was washed with cold ethanol and dried to give alkyne-TAP (0.8 g, 56%, **Figure S3** and **Figure S4**) as white solid.

$^1\text{H}$  NMR (DMSO- $d_6$ )  $\delta$  (ppm): 1.38 (quint, 2H), 1.47 (quint, 2H), 2.16 (m, 4H), 2.70 (t, 1H), 5.12 (s, 2H), 5.39 (s, 1H).

$^{13}\text{C}$  NMR (DMSO- $d_6$ )  $\delta$  (ppm): 17.86, 22.46, 27.29, 27.77, 70.98, 84.93, 85.65, 160.69, 162.04.

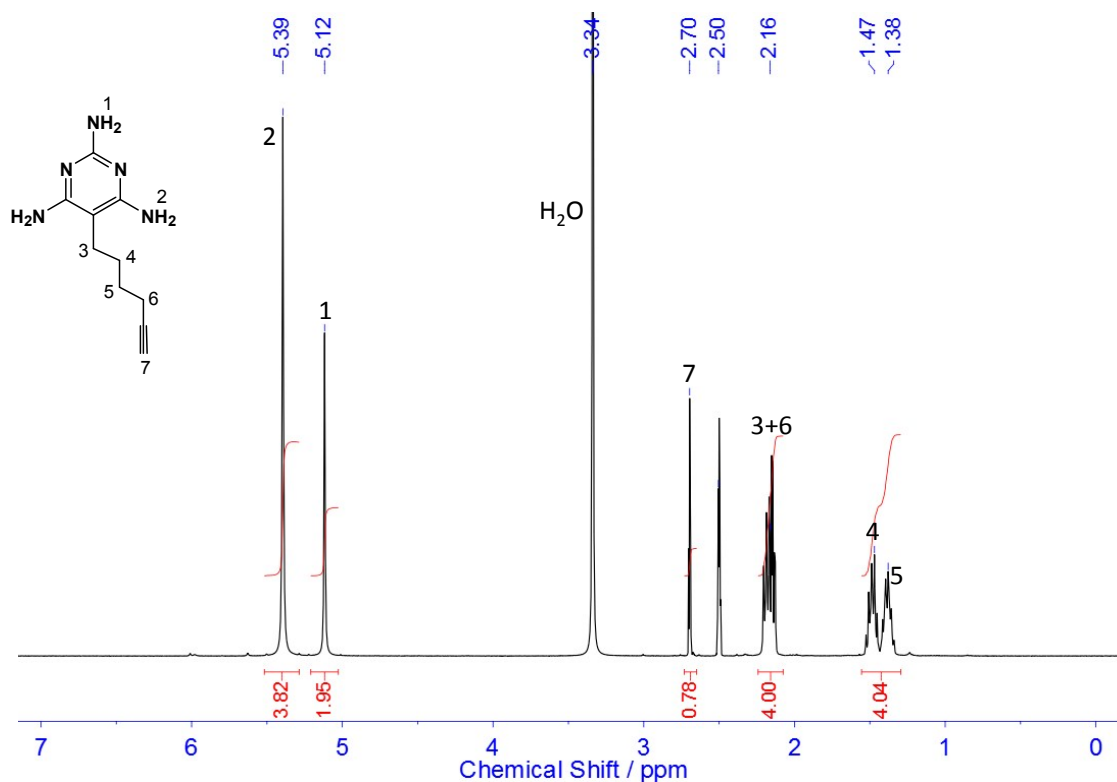

**Figure S3.**  $^1\text{H}$  NMR spectrum of alkyne-TAP recorded in DMSO- $d_6$  at 27 °C.

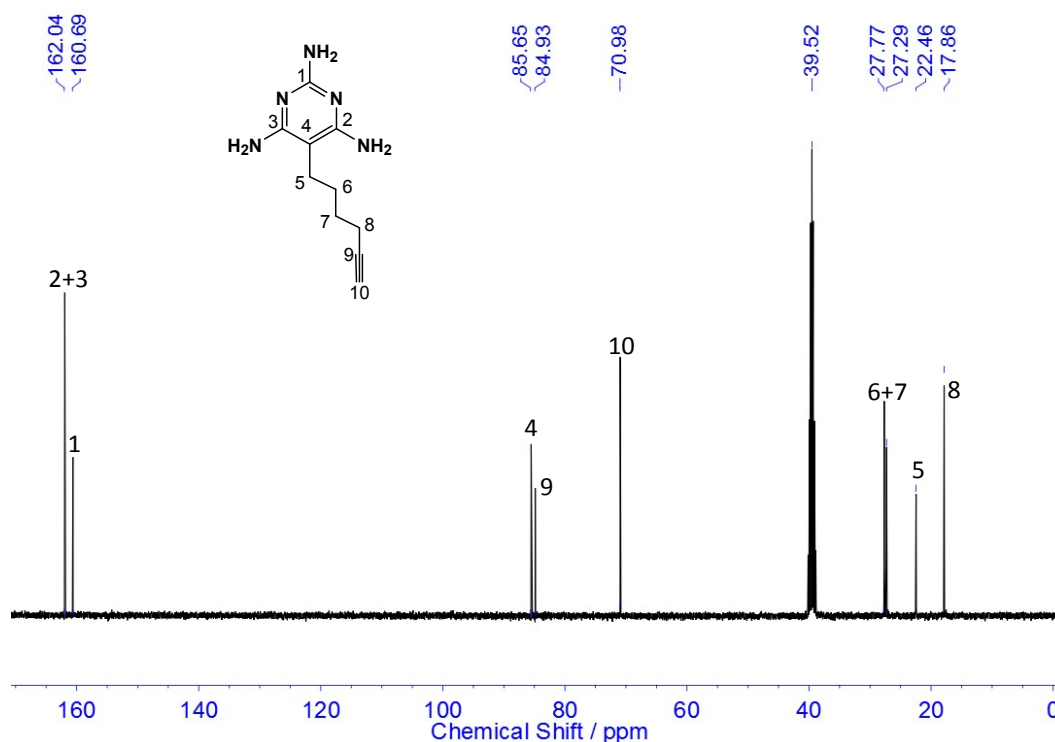

**Figure S4.**  $^{13}\text{C}$  NMR spectrum of alkyne-TAP recorded in  $\text{DMSO-d}_6$  at 27 °C.

### Synthesis of Ba-PnBuA-TAP

Ba-PnBuA-TAP (**Figure 2**) was prepared according to the reported method with modification.<sup>2</sup> Ba-PnBuA-N<sub>3</sub> (0.27 g, 0.06 mmol) and alkyne-TAP (0.011 g, 0.054 mmol) were added to a round-bottomed flask and dissolved in DMF (1 mL). Sodium L-ascorbate (0.0048 g, 0.024 mmol) was added, and the mixture was degassed by bubbling N<sub>2</sub> for ~30 min. CuSO<sub>4</sub>·5H<sub>2</sub>O (0.0015 g, 0.006 mmol) was added; the flask was degassed again by bubbling N<sub>2</sub> for ~30 min, and then allowed to stir at 60 °C for 15 h. The mixture was cooled, concentrated, dissolved in CH<sub>2</sub>Cl<sub>2</sub>, and filtered to remove CuSO<sub>4</sub>·5H<sub>2</sub>O and sodium L-ascorbate, and then the filtrate was purified by column chromatography (eluent: CH<sub>2</sub>Cl<sub>2</sub>/MeOH, 30/1, v/v) to give Ba-PnBuA-TAP as a yellowish solid (0.22 g, yield 80%). Subsequently, the obtained product Ba-

*PnBuA*-TAP was analyzed by  $^1\text{H}$  NMR (**Figure 3**, top), and MALDI-TOF MS (**Figure 4A**, B, and **Table S2**).

## MALDI-TOF MS results

**Table S1.** MALDI-TOF MS results of Ba-*PnBuA*-Br.

| Series | Species                                                                                                                                    | m/z <sub>simulated</sub>       | m/z <sub>measured</sub>        |
|--------|--------------------------------------------------------------------------------------------------------------------------------------------|--------------------------------|--------------------------------|
|        |                                                                                                                                            | $\text{g}\cdot\text{mol}^{-1}$ | $\text{g}\cdot\text{mol}^{-1}$ |
| ①      | $[\text{C}_{20}\text{H}_{33}\text{N}_2\text{O}_5(\text{C}_7\text{H}_{12}\text{O}_2)_{22}\text{Br} + \text{K}_2 + \text{Na} - 2\text{H}]^+$ | 3379.9057                      | 3379.9303                      |
| ②      | $[\text{C}_{20}\text{H}_{33}\text{N}_2\text{O}_5(\text{C}_7\text{H}_{12}\text{O}_2)_{22}\text{Br} + 3\text{K} - 2\text{H}]^+$              | 3395.8795                      | 3395.9012                      |
| ③      | $[\text{C}_{20}\text{H}_{33}\text{N}_2\text{O}_5(\text{C}_7\text{H}_{12}\text{O}_2)_{23}\text{Br} + \text{K}_2 + \text{Na} - 2\text{H}]^+$ | 3507.9855                      | 3508.0020                      |
| ④      | $[\text{C}_{20}\text{H}_{33}\text{N}_2\text{O}_5(\text{C}_7\text{H}_{12}\text{O}_2)_{23}\text{Br} + 3\text{K} - 2\text{H}]^+$              | 3636.0661                      | 3636.0943                      |

**Table S2.** MALDI-TOF MS results of Ba-*PnBuA*-TAP.

| Series | Species                                                                                                                                                             | m/z <sub>simulated</sub>       | m/z <sub>measured</sub>        |
|--------|---------------------------------------------------------------------------------------------------------------------------------------------------------------------|--------------------------------|--------------------------------|
|        |                                                                                                                                                                     | $\text{g}\cdot\text{mol}^{-1}$ | $\text{g}\cdot\text{mol}^{-1}$ |
| ①      | $[\text{C}_{20}\text{H}_{33}\text{N}_2\text{O}_5(\text{C}_7\text{H}_{12}\text{O}_2)_{22}\text{C}_{10}\text{H}_{15}\text{N}_3 + \text{Na}]^+$                        | 3401.2108                      | 3401.2537                      |
| ②      | $[\text{C}_{20}\text{H}_{33}\text{N}_2\text{O}_5(\text{C}_7\text{H}_{12}\text{O}_2)_{22}\text{C}_{10}\text{H}_{15}\text{N}_3 + \text{Na}_2 - 1\text{H}]^+$          | 3423.1938                      | 3423.2106                      |
| ③      | $[\text{C}_{20}\text{H}_{33}\text{N}_2\text{O}_5(\text{C}_7\text{H}_{12}\text{O}_2)_{22}\text{C}_{10}\text{H}_{15}\text{N}_3 + \text{Na} + \text{K} - 1\text{H}]^+$ | 3439.1675                      | 3439.1968                      |
| ④      | $[\text{C}_{20}\text{H}_{33}\text{N}_2\text{O}_5(\text{C}_7\text{H}_{12}\text{O}_2)_{23}\text{C}_{10}\text{H}_{15}\text{N}_3 + \text{Na}]^+$                        | 3529.2876                      | 3529.3152                      |
| ⑤      | $[\text{C}_{20}\text{H}_{33}\text{N}_2\text{O}_5(\text{C}_7\text{H}_{12}\text{O}_2)_{23}\text{C}_{10}\text{H}_{15}\text{N}_3 + \text{Na}_2 - 1\text{H}]^+$          | 3551.2697                      | 3551.2934                      |

## UV/Vis spectra

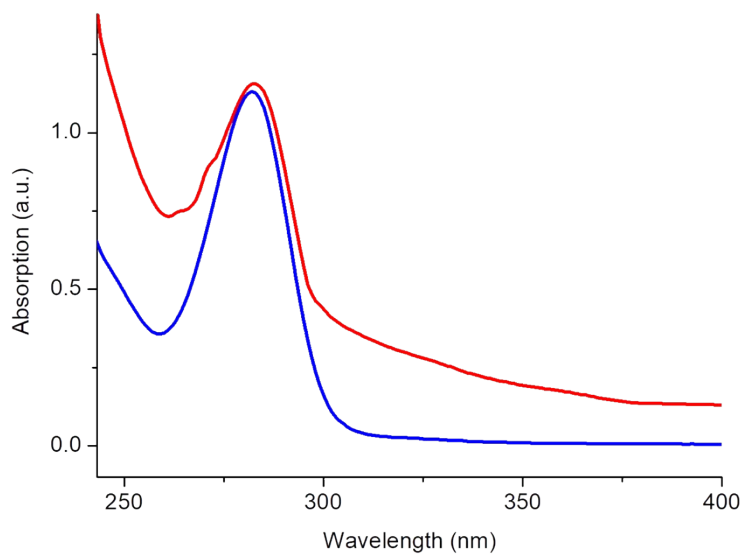

**Figure S5:** UV-vis spectra recorded from the samples Ba-PnBuA-TAP (blue) and Ba-PnBuA-TAP with 0.5 equiv. of [PdCl<sub>2</sub>(PhCN)<sub>2</sub>] (red) using CHCl<sub>3</sub> as solvent.

## Rheological results

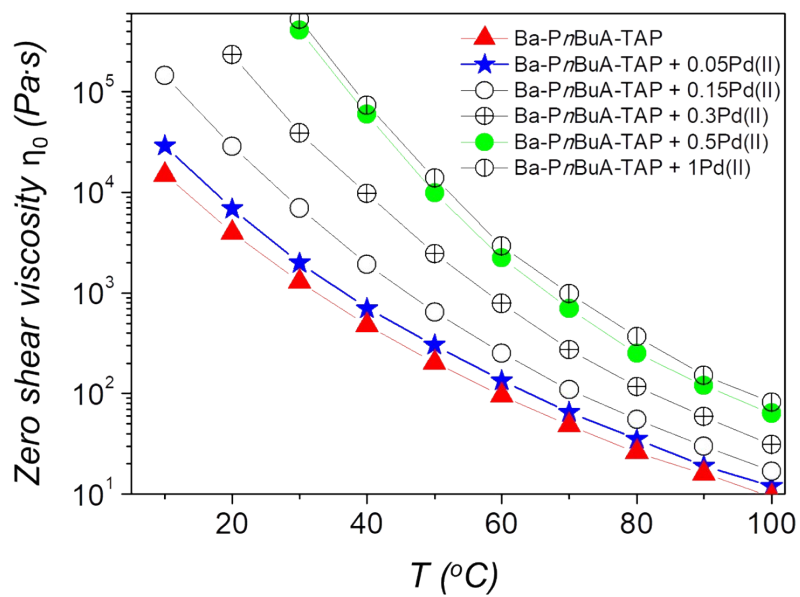

**Figure S6:** logarithmic plot of the zero shear viscosity  $\eta^0$  vs. temperature.

## TEM results

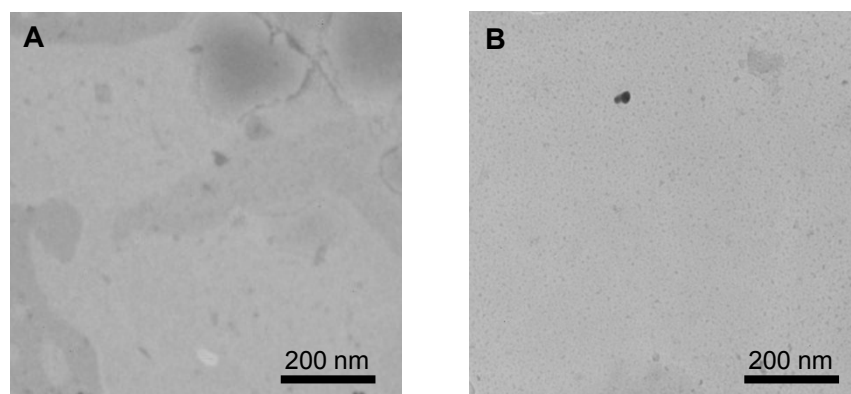

**Figure S7.** TEM images of (A) Ba-PnBuA-Br, and (B) Ba-PnBuA-Br with 0.5 equiv. of  $[\text{PdCl}_2(\text{PhCN})_2]$ .

## AFM results

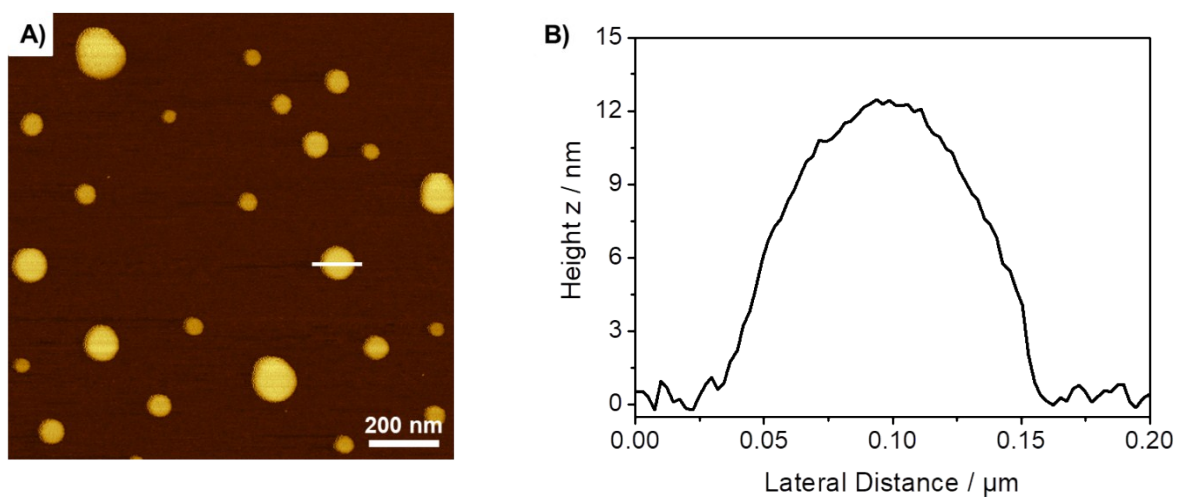

**Figure S8:** AFM height image (A), and cross-section (B) of Ba-PnBuA-TAP.

## DLS results

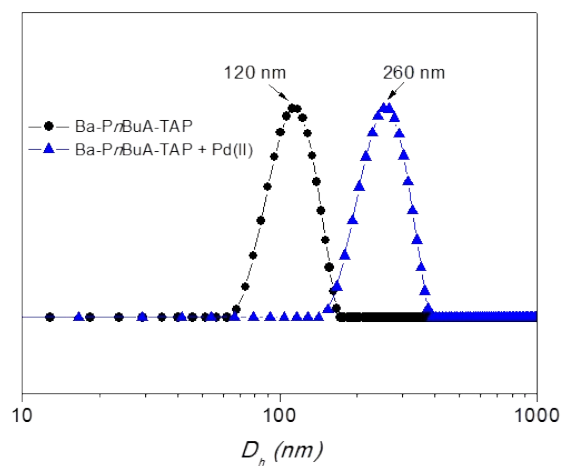

**Figure S9.** DLS results of Ba-PnBuA-TAP (black), and Ba-PnBuA-TAP + Pd(II) (blue) in toluene at 2 g/L.

## References

- (1) Chen, S.; Lechner, B.-D.; Meister, A.; Binder, W. H. Hierarchical Micelles via Polyphilic Interactions: Hydrogen-Bonded Supramolecular Dendrons and Double Immiscible Polymers. *Nano Lett.* **2016**, *16*, 1491-1496.
- (2) Herbst, F.; Binder, W. H. Comparing Solution and Melt-state Association of Hydrogen Bonds in Supramolecular Polymers. *Polym. Chem.* **2013**, *4*, 3602-3609.
